# Supplementary material
Source: Royal Society of Chemistry journal article supplement (doi:10.1039/d5nr05456g)
Supplement: d5nr05456g1.pdf [file d5nr05456g1.pdf]

## **Enhancing Crystallization and Mechanical Properties of PET Polyester Using Functionalized Carbon Nanotubes**

Pengwei Zhang<sup>a</sup>, Yao Wang<sup>a, \*\*</sup>, Miaorong Zhang<sup>a</sup>, Linjun Huang<sup>a</sup>, Kang Li<sup>a</sup>, Feng  
Li<sup>a</sup>, Wei Wang<sup>a</sup>, Jianguo Tang<sup>a, \*</sup>

<sup>a</sup> Institute of Hybrid Materials, National Center of International Research for Hybrid  
Materials Technology, National Base of International Science & Technology  
Cooperation, College of Materials Science and Engineering, Qingdao University,  
Qingdao 266071, P. R. China

\* Corresponding author.

\*\* Corresponding author.

*E-mail addresses:* tang@qdu.edu.cn (J. Tang), wangyaoqdu@126.com (Y. Wang).

**Fig S1.** TGA of CNTs, CNTs-OH and CNTs-APTES.

**Fig S2.** DSC cooling (a) and heating curves (b) of different concentrations of CNTs-APTES/PET; (c) The relative crystallinity  $X_t$  vs. crystallization time  $t-t_0$  of different concentrations of CNTs-APTES/PET and the logarithm Avrami diagram  $\ln[-\ln^{1-X_t}]$  vs.  $\ln t$  of different concentrations of CNTs-APTES/PET.

**Fig S3.** The Shape of PET hybrid materials.

**Fig S4.** Data graph of elongation at break of CNTs-OH/PET and CNTs-APTES/PET.

**Fig S5.** Data graph of tensile strength of CNTs-OH/PET and CNTs-APTES/PET.

**Fig S6.** Data graph of modulus of CNTs-OH/PET and CNTs-APTES/PET.

**Fig S7.** Polarized optical microscopy images of the isothermal crystallization process of different PET-based composites at various temperatures.

**Fig S8.** Comparison of polarized optical microscopy images of the four PET-based composites after complete crystallization at 180° C.

**Fig S9.** Rheological behavior of the four PET-based composites at different temperatures: (a - c) Shear stress as a function of shear rate; (d) Shear stress vs. shear rate curves for CNTs-APTES/PET at various temperatures; (e - g) Viscosity as a function of shear rate; (h) Viscosity vs. shear rate curves for CNTs-APTES/PET at various temperatures.

**Table S1.**  $I_D/I_G$  of the original CNTs, CNTs-OH and CNTs-APTES.

**Table S2.** The relative percentage of the carbon and assignation.

**Table S3.** Thermal properties and non-isothermal kinetic analysis for CNTs-

APTES/PET.

**Table S4.** A comparison between the results of this paper and the published results.

**Table S5.** Non-isothermal crystallization kinetic parameters of different composite materials.

**Table S6.** Non-Newtonian index  $n$  of the four PET-based composites at different temperatures.

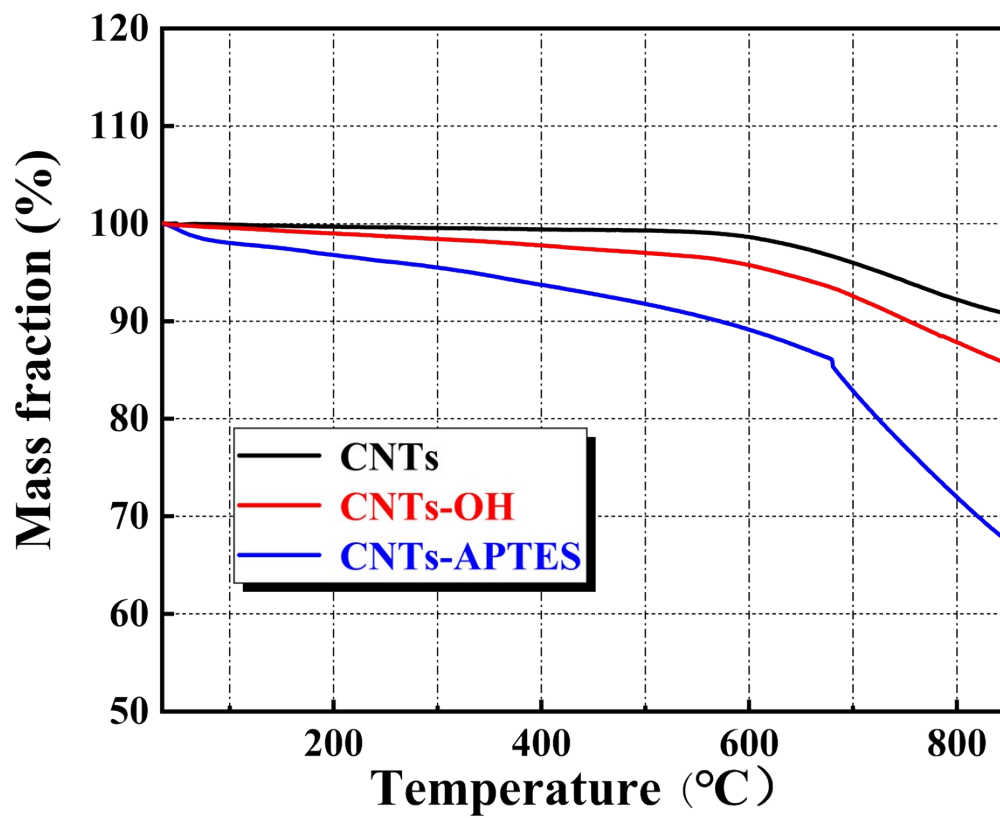

**Fig S1.** TGA of CNTs, CNTs-OH and CNTs-APTES.

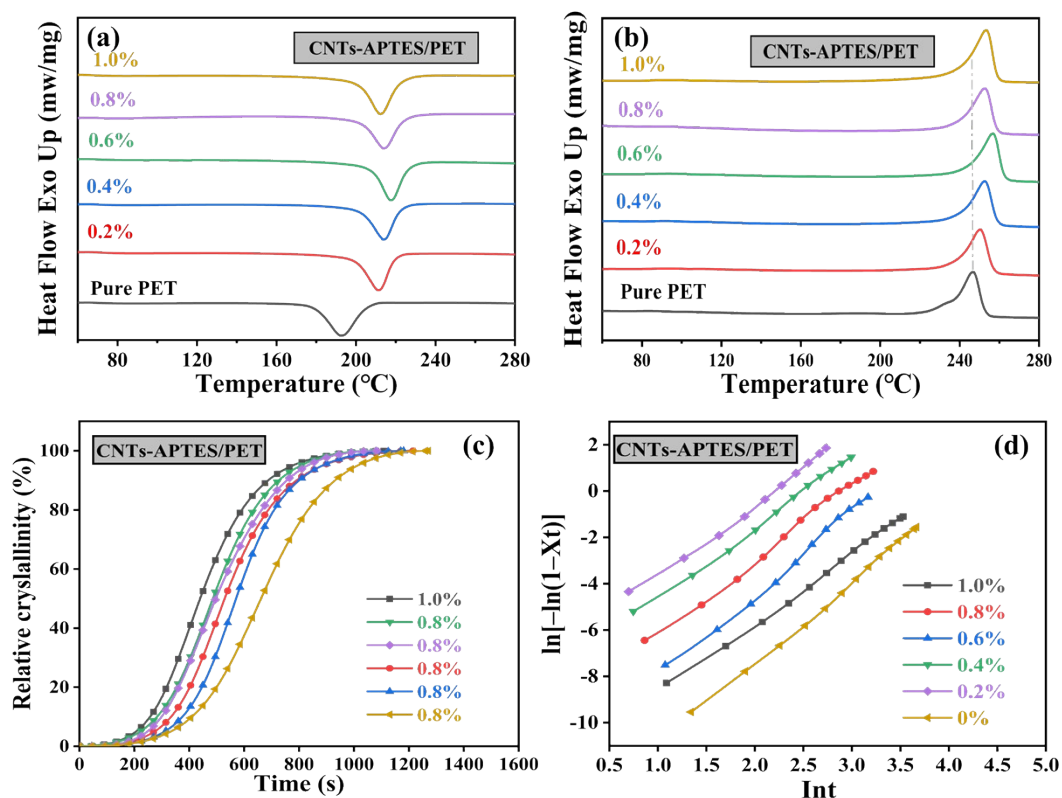

**Fig S2.** DSC cooling (a) and heating curves (b) of different concentrations of CNTs-APTES/PET; (c) The relative crystallinity  $X_t$  vs. crystallization time  $t-t_0$  of different concentrations of CNTs-APTES/PET and the logarithm Avrami diagram  $\ln[-\ln(1-X_t)]$  vs.  $\text{Int}$  of different concentrations of CNTs-APTES/PET.

**Table S1.**

$I_D/I_G$  of the original CNTs, CNTs-OH and CNTs-APTES.

| Sample     | $I_D/I_G$ |
|------------|-----------|
| CNTs       | 0.70      |
| CNTs-OH    | 1.11      |
| CNTs-APTES | 1.56      |

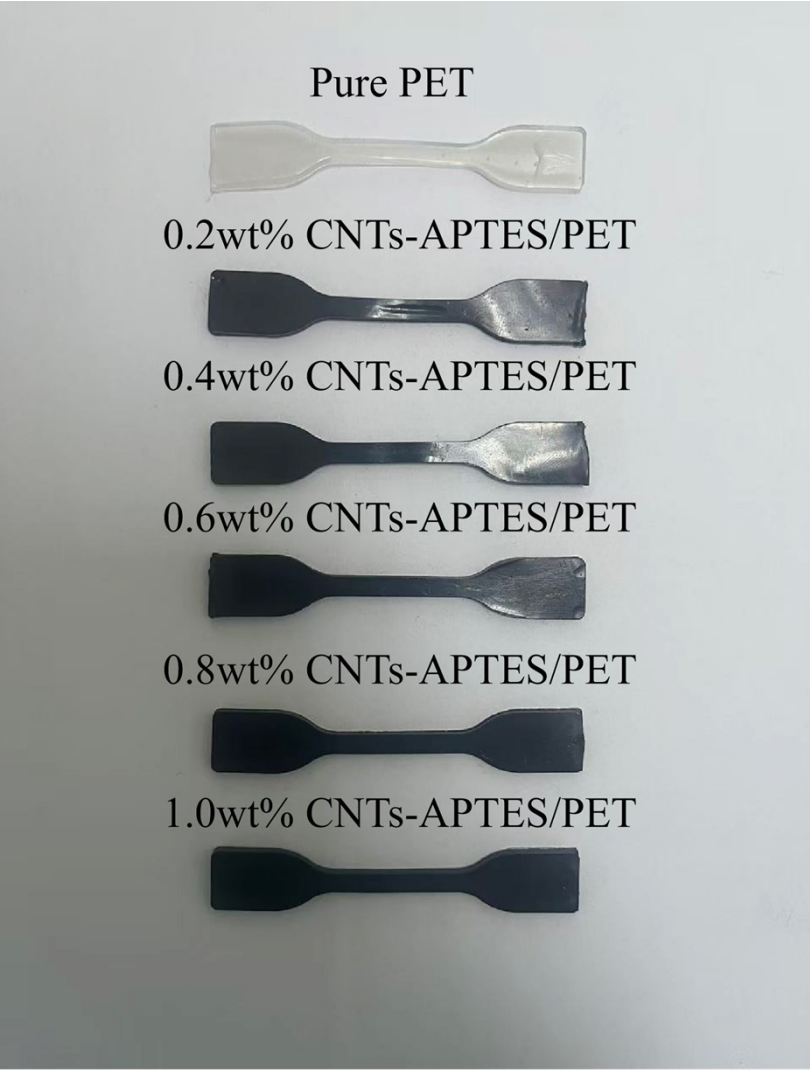

**Fig S3.** The Shape of PET hybrid materials.

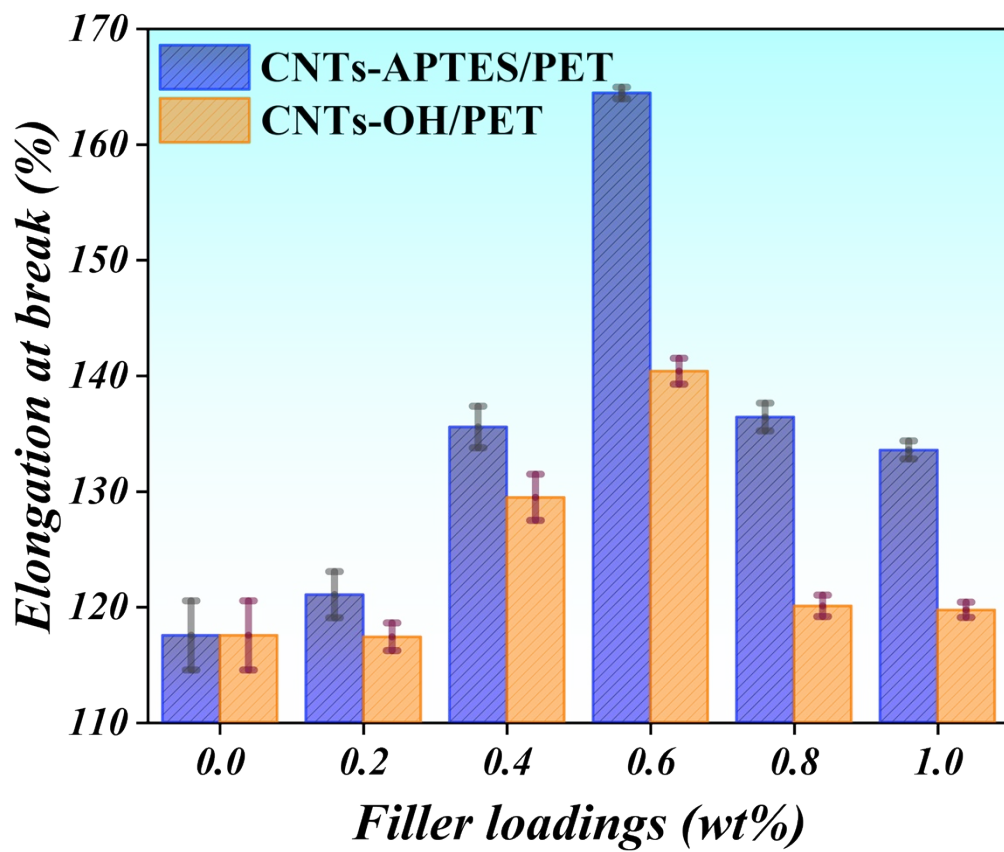

Fig S4. Data graph of elongation at break of CNTs-OH/PET and CNTs-APTES/PET.

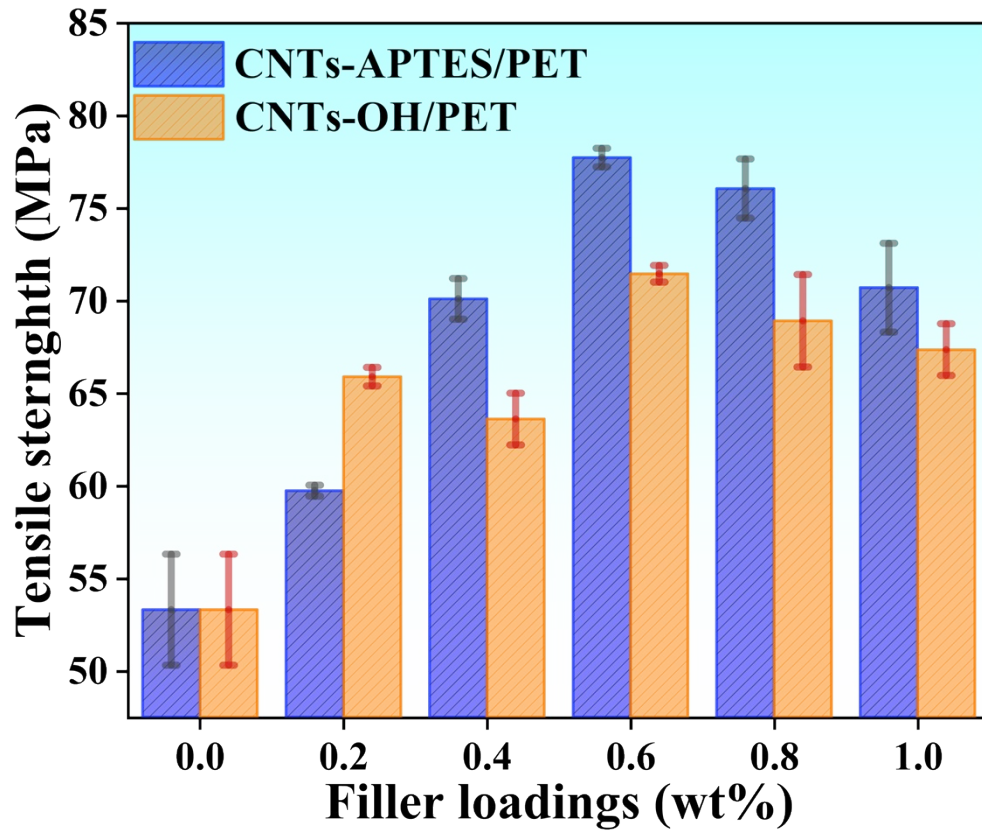

Fig S5. Data graph of tensile strength of CNTs-OH/PET and CNTs-APTES/PET.

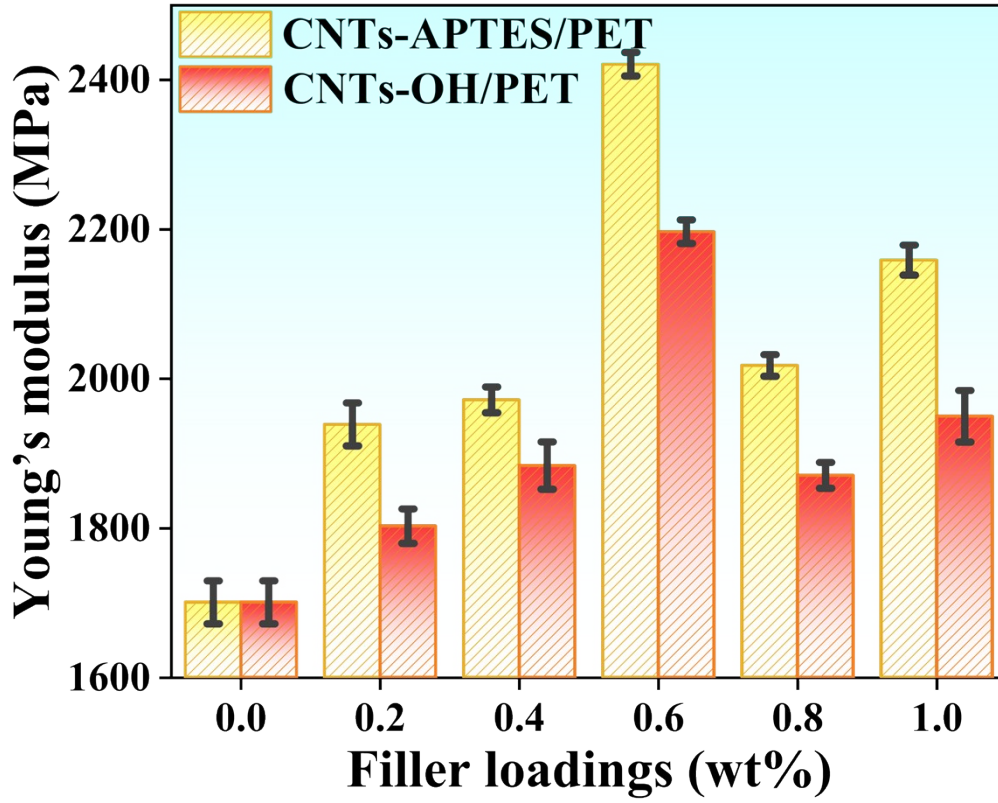

Fig S6. Data graph of modulus of CNTs-OH/PET and CNTs-APTES/PET.

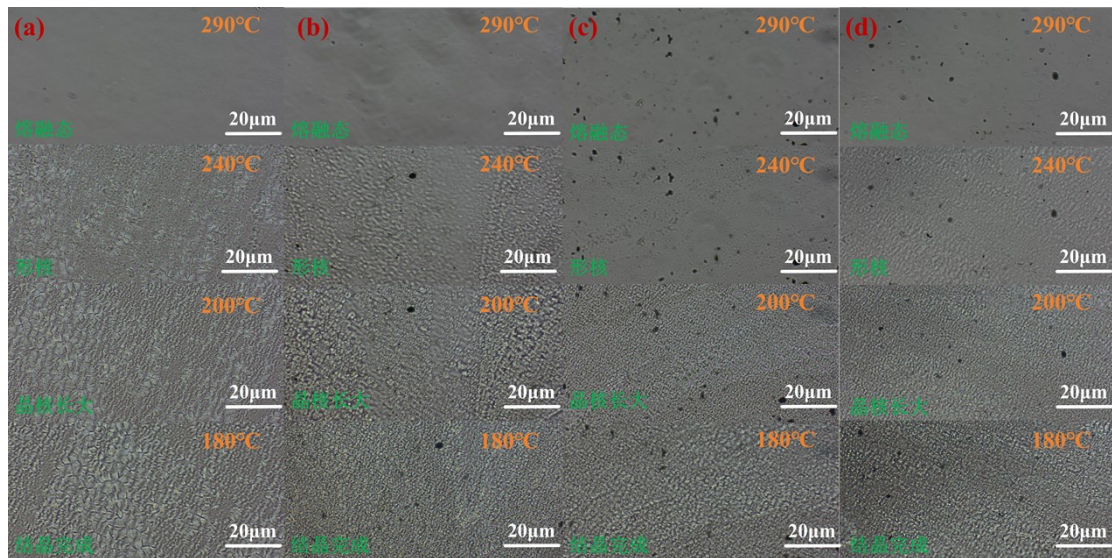

Fig S7. Polarized optical microscopy images of the isothermal crystallization process of different PET-based composites at various temperatures.

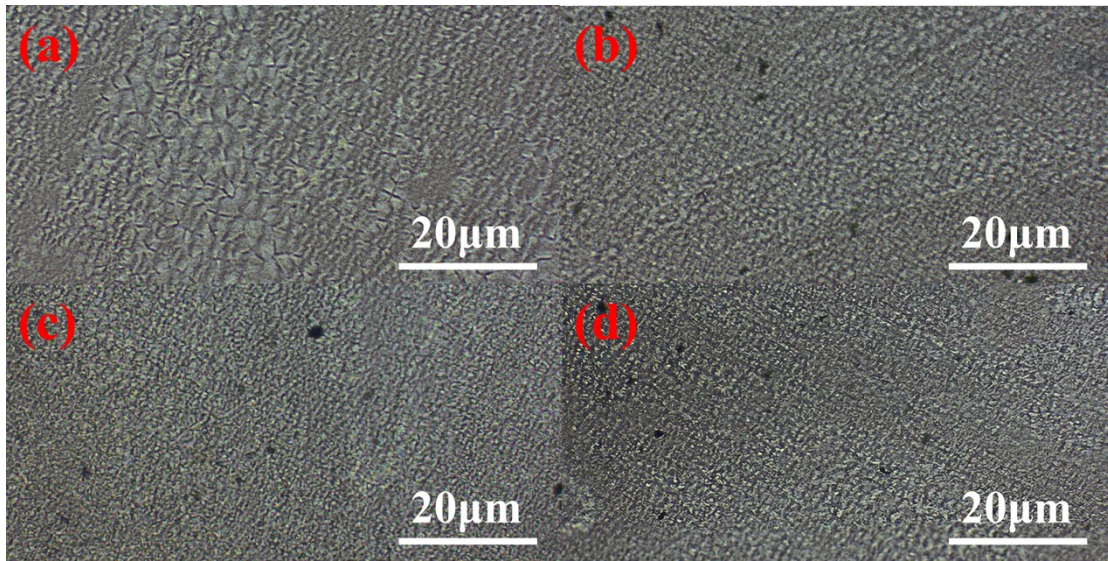

**Fig S8.** Comparison of polarized optical microscopy images of the four PET-based composites after complete crystallization at 180°C.

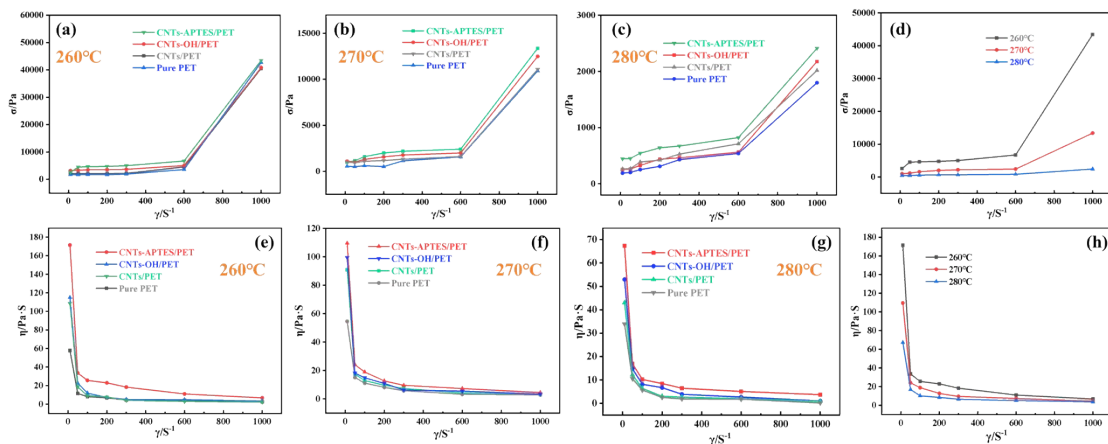

**Fig S9.** Rheological behavior of the four PET-based composites at different temperatures: (a–c) Shear stress as a function of shear rate; (d) Shear stress vs. shear rate curves for CNTs-APTES/PET at various temperatures; (e–g) Viscosity as a function of shear rate; (h) Viscosity vs. shear rate curves for CNTs-APTES/PET at various temperatures.

**Table S2.**

Characteristics of pristine CNTs, CNTs-OH and CNTs-APTES by XRD

| Sample                              | CNTs | CNTs-OH | CNTs-APTES |
|-------------------------------------|------|---------|------------|
| peak location ( $2\theta/^\circ$ )  | 25.8 | 25.9    | 25.7       |
| half-peak width ( $\theta/^\circ$ ) | 4.13 | 6.82    | 7.21       |

**Table S3.**

Thermal properties and non-isothermal kinetic analysis for CNTs-APTES/PET

| Content(%)             | $T_c(^\circ\text{C})$ | $T_m(^\circ\text{C})$ | $T_g(^\circ\text{C})$ | $\Delta H_m(\text{J/g})$ | $\Delta H_c(\text{J/g})$ | $X_t(\%)$ | $T(\text{s})$ | $n$  | $K_c$ |
|------------------------|-----------------------|-----------------------|-----------------------|--------------------------|--------------------------|-----------|---------------|------|-------|
| Pure PET               | 192.9                 | 246.4                 | 71.5                  | 28.04                    | 26.82                    | 20.0      | 665           | 3.09 | 0.40  |
| 0.2%CNTs-<br>APTES/PET | 211.4                 | 250.1                 | 73.9                  | 43.06                    | 34.77                    | 30.8      | 568           | 3.03 | 0.52  |
| 0.4%CNTs-<br>APTES/PET | 214.1                 | 252.6                 | 78.0                  | 42.36                    | 39.12                    | 30.2      | 502           | 2.97 | 0.54  |
| 0.6%CNTs-<br>APTES/PET | 218.4                 | 257.1                 | 81.7                  | 50.59                    | 46.36                    | 36.1      | 407           | 2.73 | 0.58  |
| 0.8%CNTs-<br>APTES/PET | 214.3                 | 252.5                 | 77.4                  | 43.13                    | 39.72                    | 30.8      | 495           | 2.91 | 0.55  |
| 1.0%CNTs-<br>APTES/PET | 212.2                 | 253.2                 | 75.2                  | 40.28                    | 35.96                    | 28.8      | 520           | 3.01 | 0.51  |

|                 |       |       |      |       |       |      |     |      |      |
|-----------------|-------|-------|------|-------|-------|------|-----|------|------|
| 0.6%CNTs/PET    | 210.2 | 250.4 | 79.2 | 44.61 | 40.36 | 31.9 | 535 | 2.87 | 0.52 |
| 0.6%CNTs-OH/PET | 215.3 | 253.9 | 80.8 | 46.88 | 43.69 | 33.5 | 458 | 2.81 | 0.56 |

**Table S4.**

Non-Newtonian index n of the four PET-based composites at different temperatures.

| sample.        | Temperature |       |       |
|----------------|-------------|-------|-------|
|                | 260°C       | 270°C | 280°C |
| Pure PET       | 0.80        | 0.84  | 0.88  |
| CNTs/PET       | 0.70        | 0.74  | 0.78  |
| CNTs-OH/PET    | 0.62        | 0.66  | 0.70  |
| CNTs-APTES/PET | 0.50        | 0.55  | 0.60  |

**Table S4.**

A comparison between the results of this paper and the published results.

| Performance Index | Traditional Concentrated Acid Oxidation Method | This paper | Enhancement |
|-------------------|------------------------------------------------|------------|-------------|
|                   |                                                |            |             |

|                                      |                    |                                 |                                                                                                                      |
|--------------------------------------|--------------------|---------------------------------|----------------------------------------------------------------------------------------------------------------------|
| CNTs functionalization time          | 48 h + 24 h = 72 h | 8 h + 12 h = 20 h               | $\approx 72.2\%$ (original "90%" was a misstatement; revised to "reduced by $\sim 72\%$ " to align with actual data) |
| sp <sup>2</sup> carbon skeleton loss | >40% [21]          | 25.6% (XPS data in Section 3.2) | Loss reduced by 36%                                                                                                  |
| PET tensile strength increase        | $\sim 25\%$ [34]   | 48.3%                           | Enhancement improved by 93%                                                                                          |

**Table S5.**

Non-isothermal crystallization kinetic parameters of different composite materials

| sample.        | Avrami exponent(<br>n) | Crystallization rate constant Kt (min <sup>-1</sup> ). | Half-crystallization time t <sub>1/2</sub> (min). |
|----------------|------------------------|--------------------------------------------------------|---------------------------------------------------|
| Pure PET       | 2.2 ± 0.1              | 0.0023 ± 0.0002                                        | 8.6 ± 0.3                                         |
| CNTs/PET       | 2.4 ± 0.1              | 0.0035 ± 0.0003                                        | 6.2 ± 0.2                                         |
| CNTs-OH/PET    | 2.6 ± 0.1              | 0.0051 ± 0.0003                                        | 5.3 ± 0.2                                         |
| CNTs-APTES/PET | 2.9 ± 0.1              | 0.0087 ± 0.0003                                        | 5.2 ± 0.1                                         |
